# Supplementary material
Source: PubMed Central journal article supplement (PMC10512785)
Supplement: jcm.00316-23-s0001.pdf [file jcm.00316-23-s0001.pdf]

**Table S1.** Meropenem zone diameters of CP-CRPA isolates tested negative by mCIM.

| Specimen ID | mCIM result | Meropenem zone diameter (mm) | Carbapenemase genotype by WGS |
|-------------|-------------|------------------------------|-------------------------------|
| S01102      | Negative    | 6                            | <i>bla</i> <sub>VIM-2</sub>   |
| S01095      | Negative    | 6                            | <i>bla</i> <sub>VIM-2</sub>   |
| S01573-C    | Negative    | 6                            | <i>bla</i> <sub>VIM-2</sub>   |
| S01616      | Negative    | 6                            | <i>bla</i> <sub>IMP-1</sub>   |
| S01633      | Negative    | 6                            | <i>bla</i> <sub>VIM-2</sub>   |
| S01634      | Negative    | 6                            | <i>bla</i> <sub>VIM-2</sub>   |
| S01725      | Negative    | 6                            | <i>bla</i> <sub>VIM-2</sub>   |
| S01835-B    | Negative    | 6                            | <i>bla</i> <sub>GES-5</sub>   |
| S01865      | Negative    | 6                            | <i>bla</i> <sub>IMP-1</sub>   |
| S01875-A    | Negative    | 6                            | <i>bla</i> <sub>IMP-7</sub>   |
| S01897      | Negative    | 6                            | <i>bla</i> <sub>VIM-2</sub>   |
| S02042      | Negative    | 6                            | <i>bla</i> <sub>VIM-2</sub>   |
| S02101      | Negative    | 6                            | <i>bla</i> <sub>VIM-2</sub>   |
| S02245      | Negative    | 6                            | <i>bla</i> <sub>VIM-2</sub>   |
| S02278-B    | Negative    | 6                            | <i>bla</i> <sub>VIM-2</sub>   |

**Table S2.** Quality control isolates for the two lots of NG-Test CARBA 5 test kits used in our study.

| Specimen ID         | Species                       | Genotype | CARBA 5 Lot Numbers | CARBA 5 Expiry | Test Lines Present <sup>b</sup> |       |       |       |       |       |
|---------------------|-------------------------------|----------|---------------------|----------------|---------------------------------|-------|-------|-------|-------|-------|
|                     |                               |          |                     |                | C(ontrol)                       | N(DM) | I(MP) | V(IM) | O(XA) | K(PC) |
| C00505 <sup>a</sup> | <i>Klebsiella pneumoniae</i>  | OXA-48   | 220204-01-A         | 2023-10        | +                               |       |       |       | +     |       |
|                     |                               |          | 220421-01-A         | 2024-03        |                                 |       |       |       |       |       |
| C00660              | <i>Escherichia coli</i>       | NDM      | 220204-01-A         | 2023-10        | +                               | +     |       |       |       |       |
|                     |                               |          | 220421-01-A         | 2024-03        |                                 |       |       |       |       |       |
| C00855              | <i>Klebsiella pneumoniae</i>  | KPC      | 220204-01-A         | 2023-10        | +                               |       |       |       |       | +     |
|                     |                               |          | 220421-01-A         | 2024-03        |                                 |       |       |       |       |       |
| C00714              | <i>Enterobacter cloacae</i>   | IMP      | 220204-01-A         | 2023-10        | +                               |       | +     |       |       |       |
|                     |                               |          | 220421-01-A         | 2024-03        |                                 |       |       |       |       |       |
| C00733              | <i>Pseudomonas aeruginosa</i> | VIM      | 220204-01-A         | 2023-10        | +                               |       |       | +     |       |       |
|                     |                               |          | 220421-01-A         | 2024-03        |                                 |       |       |       |       |       |
| ATCC 25922          | <i>Escherichia coli</i>       | Negative | 220204-01-A         | 2023-10        | +                               |       |       |       |       |       |
|                     |                               |          | 220421-01-A         | 2024-03        |                                 |       |       |       |       |       |

<sup>a</sup> Internal controls, unless a specific reference strain is specified.

<sup>b</sup> ‘+’ = test line present.

**Table S3.** Quality control isolates for Xpert Carba-R.

| Specimen ID | Species                       | Genotype | Xpert Carba-R Lot Number | Expiry    | Xpert Carba-R Result <sup>a</sup> |     |     |     |     | Remarks                                               |
|-------------|-------------------------------|----------|--------------------------|-----------|-----------------------------------|-----|-----|-----|-----|-------------------------------------------------------|
|             |                               |          |                          |           | OXA-48                            | NDM | KPC | IMP | VIM |                                                       |
| C00505      | <i>Klebsiella pneumoniae</i>  | OXA-48   | 1000367402               | 20/8/2023 | +                                 | ND  | ND  | ND  | ND  | Positive control 1 (comprised of OXA-48, NDM and KPC) |
| C00660      | <i>Escherichia coli</i>       | NDM      | 1000367402               | 20/8/2023 | ND                                | +   | ND  | ND  | ND  | Positive control 1 (comprised of OXA-48, NDM and KPC) |
| C00855      | <i>Klebsiella pneumoniae</i>  | KPC      | 1000367402               | 20/8/2023 | ND                                | ND  | +   | ND  | ND  | Positive control 1 (comprised of OXA-48, NDM and KPC) |
| C00714      | <i>Enterobacter cloacae</i>   | IMP      | 1000367402               | 20/8/2023 | ND                                | ND  | ND  | +   | ND  | Positive control 2 (comprised of IMP and VIM)         |
| C00733      | <i>Pseudomonas aeruginosa</i> | VIM      | 1000367402               | 20/8/2023 | ND                                | ND  | ND  | ND  | +   | Positive control 2 (comprised of IMP and VIM)         |
| ATCC 25922  | <i>Escherichia coli</i>       | Negative | 1000367402               | 20/8/2023 | ND                                | ND  | ND  | ND  | ND  | Negative control                                      |

<sup>a</sup> ‘+’ = test line present. ND = Not detected

**Table S4.** Quality control isolates used for quality control testing of carbapenemase inactivation methods.

| Control type                      | Specimen ID/Reference strain | Species                        | Genotype |
|-----------------------------------|------------------------------|--------------------------------|----------|
| mCIM positive control             | MBRL 235                     | <i>Escherichia coli</i>        | NDM      |
| CIMTris positive control          | C00003 <sup>a</sup>          | <i>Acinetobacter baumannii</i> | NDM      |
| Negative control (for both tests) | ATCC 25922                   | <i>Escherichia coli</i>        | N/A      |

<sup>a</sup> Internal control.

**Figure S1.** Image showing clear false positive (for IMP), faint false positive (for IMP), and negative NG-Test CARBA 5 assays performed on CRAB isolates in our laboratory.

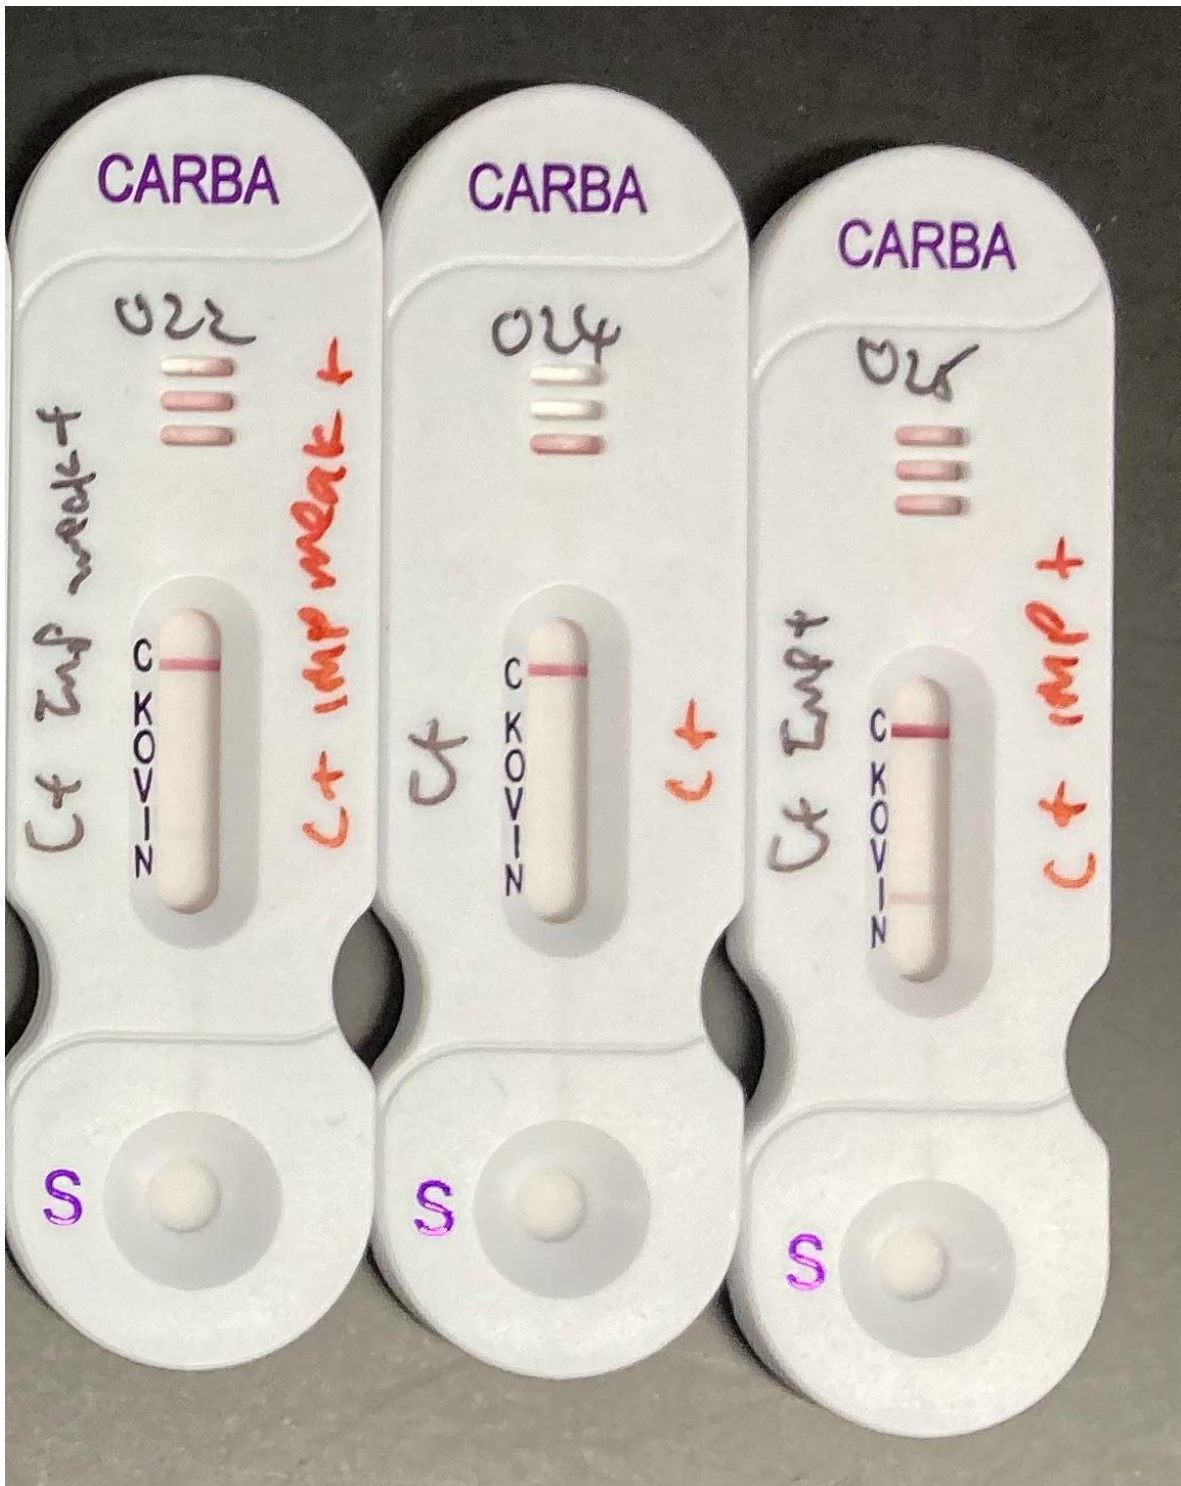

Test 025 (right) is clearly positive for IMP. Test 022 (left) is faintly positive. Test 024 (centre) shows a negative result (only the control line is visible). The differences are much clearer to the naked eye than when rendered after image capture on screen/print.

**Table S5.** Line listing of all beta-lactamase genes harboured by CRAB isolates ( $n = 97$ ) in our study.

| Specimen ID | Carbapenemase genes ('big 5') | Carbapenemase genes (other)                                                 | Other beta-lactamase genes    |                               | Sequence type | NG-Test CARBA 5 result |
|-------------|-------------------------------|-----------------------------------------------------------------------------|-------------------------------|-------------------------------|---------------|------------------------|
| C00003      | <i>bla</i> <sub>NDM-1</sub>   | <i>bla</i> <sub>OXA-104</sub> (OXA-51 family), <i>bla</i> <sub>OXA-23</sub> | <i>bla</i> <sub>ADC-26</sub>  | <i>bla</i> <sub>PER-7</sub>   | 149           | NDM                    |
| C00044-A    | <i>bla</i> <sub>NDM-1</sub>   | <i>bla</i> <sub>OXA-65</sub> (OXA-51 family), <i>bla</i> <sub>OXA-58</sub>  | <i>bla</i> <sub>ADC-32</sub>  |                               | NA            | NDM                    |
| C00044-B    | <i>bla</i> <sub>NDM-1</sub>   | <i>bla</i> <sub>OXA-65</sub> (OXA-51 family), <i>bla</i> <sub>OXA-58</sub>  | <i>bla</i> <sub>ADC-32</sub>  |                               | NA            | NDM                    |
| C00168      |                               | <i>bla</i> <sub>OXA-66</sub> (OXA-51 family), <i>bla</i> <sub>OXA-23</sub>  | <i>bla</i> <sub>ADC-115</sub> | <i>bla</i> <sub>TEM-1</sub>   | 2             | IMP                    |
| C00179      |                               | <i>bla</i> <sub>OXA-66</sub> (OXA-51 family), <i>bla</i> <sub>OXA-23</sub>  | <i>bla</i> <sub>ADC-115</sub> | <i>bla</i> <sub>TEM-1</sub>   | 2             | IMP                    |
| C00186      |                               | <i>bla</i> <sub>OXA-66</sub> (OXA-51 family), <i>bla</i> <sub>OXA-23</sub>  | <i>bla</i> <sub>ADC-115</sub> | <i>bla</i> <sub>TEM-1</sub>   | 2             | IMP                    |
| C00250      |                               | <i>bla</i> <sub>OXA-66</sub> (OXA-51 family), <i>bla</i> <sub>OXA-23</sub>  | <i>bla</i> <sub>ADC-73</sub>  |                               | 2             | IMP                    |
| C00356      |                               | <i>bla</i> <sub>OXA-66</sub> (OXA-51 family), <i>bla</i> <sub>OXA-23</sub>  | <i>bla</i> <sub>ADC-73</sub>  | <i>bla</i> <sub>TEM-1</sub>   | 2             | IMP                    |
| C00415      |                               | <i>bla</i> <sub>OXA-66</sub> (OXA-51 family)                                | <i>bla</i> <sub>ADC-73</sub>  |                               | 2             | IMP                    |
| C00435      |                               | <i>bla</i> <sub>OXA-69</sub> (OXA-51 family), <i>bla</i> <sub>OXA-23</sub>  | <i>bla</i> <sub>ADC-11</sub>  |                               | 1             | IMP                    |
| C00480-B    |                               | <i>bla</i> <sub>OXA-91</sub> (OXA-51 family), <i>bla</i> <sub>OXA-23</sub>  | <i>bla</i> <sub>ADC-52</sub>  | <i>bla</i> <sub>CARB-16</sub> | 164           | IMP                    |
| C00730      |                               | <i>bla</i> <sub>OXA-66</sub> (OXA-51 family), <i>bla</i> <sub>OXA-23</sub>  | <i>bla</i> <sub>ADC-73</sub>  |                               | 2             | IMP                    |
| C00762      |                               | <i>bla</i> <sub>OXA-91</sub> (OXA-51 family), <i>bla</i> <sub>OXA-23</sub>  | <i>bla</i> <sub>ADC-52</sub>  | <i>bla</i> <sub>CARB-16</sub> | 164           | IMP                    |
| C00785      |                               | <i>bla</i> <sub>OXA-69</sub> (OXA-51 family), <i>bla</i> <sub>OXA-23</sub>  | <i>bla</i> <sub>ADC-11</sub>  |                               | 1             | IMP                    |

|          |                             |                                                                                                           |                               |                               |     |           |
|----------|-----------------------------|-----------------------------------------------------------------------------------------------------------|-------------------------------|-------------------------------|-----|-----------|
| C00815-B |                             | <i>bla</i> <sub>OXA-91</sub> (OXA-51 family), <i>bla</i> <sub>OXA-23</sub>                                | <i>bla</i> <sub>ADC-52</sub>  | <i>bla</i> <sub>CARB-16</sub> | 164 | IMP       |
| C00877   |                             | <i>bla</i> <sub>OXA-66</sub> (OXA-51 family), <i>bla</i> <sub>OXA-23</sub>                                | <i>bla</i> <sub>ADC-73</sub>  | <i>bla</i> <sub>TEM-1</sub>   | 2   | IMP       |
| C00878   |                             | <i>bla</i> <sub>OXA-66</sub> (OXA-51 family), <i>bla</i> <sub>OXA-23</sub>                                | <i>bla</i> <sub>ADC-73</sub>  | <i>bla</i> <sub>TEM</sub>     | 2   | IMP       |
| C00887   |                             | <i>bla</i> <sub>OXA-66</sub> (OXA-51 family), <i>bla</i> <sub>OXA-23</sub>                                | <i>bla</i> <sub>ADC-73</sub>  | <i>bla</i> <sub>TEM-1</sub>   | 2   | IMP       |
| C00914   |                             | <i>bla</i> <sub>OXA-66</sub> (OXA-51 family), <i>bla</i> <sub>OXA-23</sub>                                | <i>bla</i> <sub>ADC-73</sub>  |                               | 2   | IMP       |
| C00971   |                             | <i>bla</i> <sub>OXA-69</sub> (OXA-51 family), <i>bla</i> <sub>OXA-23</sub>                                | <i>bla</i> <sub>ADC-11</sub>  |                               | 1   | IMP       |
| C00977   |                             | <i>bla</i> <sub>OXA-66</sub> (OXA-51 family), <i>bla</i> <sub>OXA-23</sub>                                | <i>bla</i> <sub>ADC-73</sub>  | <i>bla</i> <sub>TEM-1</sub>   | 2   | IMP       |
| C00984   |                             | <i>bla</i> <sub>OXA-66</sub> (OXA-51 family), <i>bla</i> <sub>OXA-23</sub>                                | <i>bla</i> <sub>ADC-73</sub>  | <i>bla</i> <sub>TEM-1</sub>   | 2   | IMP       |
| C00985   |                             | <i>bla</i> <sub>OXA-66</sub> (OXA-51 family), <i>bla</i> <sub>OXA-23</sub>                                | <i>bla</i> <sub>ADC-73</sub>  |                               | 2   | IMP       |
| C00987   |                             | <i>bla</i> <sub>OXA-91</sub> (OXA-51 family), <i>bla</i> <sub>OXA-23</sub>                                | <i>bla</i> <sub>ADC-52</sub>  | <i>bla</i> <sub>CARB-16</sub> | 164 | IMP       |
| C01026   |                             | <i>bla</i> <sub>OXA-66</sub> (OXA-51 family), <i>bla</i> <sub>OXA-23</sub>                                | <i>bla</i> <sub>ADC</sub>     | <i>bla</i> <sub>TEM-1</sub>   | 2   | IMP       |
| C01029   |                             | <i>bla</i> <sub>OXA-66</sub> (OXA-51 family), <i>bla</i> <sub>OXA-23</sub>                                | <i>bla</i> <sub>ADC-73</sub>  |                               | 2   | IMP       |
| C01060   |                             | <i>bla</i> <sub>OXA-66</sub> (OXA-51 family), <i>bla</i> <sub>OXA-23</sub>                                | <i>bla</i> <sub>ADC-73</sub>  | <i>bla</i> <sub>TEM-1</sub>   | 2   | IMP       |
| C01061   |                             | <i>bla</i> <sub>OXA-66</sub> (OXA-51 family), <i>bla</i> <sub>OXA-23</sub>                                | <i>bla</i> <sub>ADC-73</sub>  | <i>bla</i> <sub>TEM-1</sub>   | 2   | IMP       |
| C01075   |                             | <i>bla</i> <sub>OXA-66</sub> (OXA-51 family), <i>bla</i> <sub>OXA-23</sub>                                |                               | <i>bla</i> <sub>TEM-1</sub>   | 2   | IMP       |
| C01079   |                             | <i>bla</i> <sub>OXA-66</sub> (OXA-51 family), <i>bla</i> <sub>OXA-23</sub>                                | <i>bla</i> <sub>ADC-115</sub> |                               | 2   | IMP       |
| C01081   | <i>bla</i> <sub>NDM-1</sub> | <i>bla</i> <sub>OXA-64</sub> (OXA-51 family), <i>bla</i> <sub>OXA-58</sub> , <i>bla</i> <sub>OXA-23</sub> | <i>bla</i> <sub>ADC-26</sub>  |                               | 25  | NDM + IMP |

|        |                             |                                                                            |                              |                             |     |           |
|--------|-----------------------------|----------------------------------------------------------------------------|------------------------------|-----------------------------|-----|-----------|
| C01083 |                             | <i>bla</i> <sub>OXA-66</sub> (OXA-51 family), <i>bla</i> <sub>OXA-23</sub> | <i>bla</i> <sub>ADC-73</sub> | <i>bla</i> <sub>TEM-1</sub> | 2   | IMP       |
| C01100 |                             | <i>bla</i> <sub>OXA-66</sub> (OXA-51 family), <i>bla</i> <sub>OXA-23</sub> | <i>bla</i> <sub>ADC-73</sub> |                             | 2   | IMP       |
| C01111 |                             | <i>bla</i> <sub>OXA-66</sub> (OXA-51 family), <i>bla</i> <sub>OXA-23</sub> | <i>bla</i> <sub>ADC</sub>    |                             | 2   | IMP       |
| C01112 |                             | <i>bla</i> <sub>OXA-66</sub> (OXA-51 family), <i>bla</i> <sub>OXA-23</sub> | <i>bla</i> <sub>ADC-73</sub> | <i>bla</i> <sub>TEM-1</sub> | 2   | IMP       |
| C01117 |                             | <i>bla</i> <sub>OXA-66</sub> (OXA-51 family), <i>bla</i> <sub>OXA-23</sub> | <i>bla</i> <sub>ADC-73</sub> | <i>bla</i> <sub>TEM-1</sub> | 2   | IMP       |
| C01129 |                             | <i>bla</i> <sub>OXA-66</sub> (OXA-51 family), <i>bla</i> <sub>OXA-23</sub> | <i>bla</i> <sub>ADC</sub>    |                             | 2   | IMP       |
| C01130 |                             | <i>bla</i> <sub>OXA-66</sub> (OXA-51 family), <i>bla</i> <sub>OXA-23</sub> | <i>bla</i> <sub>ADC</sub>    |                             | 2   | IMP       |
| C01147 |                             | <i>bla</i> <sub>OXA-66</sub> (OXA-51 family), <i>bla</i> <sub>OXA-23</sub> | <i>bla</i> <sub>ADC-73</sub> | <i>bla</i> <sub>TEM-1</sub> | 2   | IMP       |
| C01173 | <i>bla</i> <sub>NDM-1</sub> | <i>bla</i> <sub>OXA-58</sub>                                               | <i>bla</i> <sub>ADC</sub>    |                             | 782 | NDM + IMP |
| C01174 |                             | <i>bla</i> <sub>OXA-66</sub> (OXA-51 family), <i>bla</i> <sub>OXA-23</sub> | <i>bla</i> <sub>ADC-73</sub> | <i>bla</i> <sub>TEM-1</sub> | 2   | IMP       |
| C01189 |                             | <i>bla</i> <sub>OXA-66</sub> (OXA-51 family), <i>bla</i> <sub>OXA-23</sub> | <i>bla</i> <sub>ADC-73</sub> | <i>bla</i> <sub>TEM-1</sub> | 2   | IMP       |
| C01205 |                             | <i>bla</i> <sub>OXA-66</sub> (OXA-51 family), <i>bla</i> <sub>OXA-23</sub> | <i>bla</i> <sub>ADC-73</sub> | <i>bla</i> <sub>TEM-1</sub> | 2   | IMP       |
| C01239 |                             | <i>bla</i> <sub>OXA-69</sub> (OXA-51 family), <i>bla</i> <sub>OXA-23</sub> | <i>bla</i> <sub>ADC-11</sub> |                             | 1   | IMP       |
| C01270 |                             | <i>bla</i> <sub>OXA-66</sub> (OXA-51 family), <i>bla</i> <sub>OXA-23</sub> | <i>bla</i> <sub>ADC-73</sub> |                             | 2   | IMP       |
| C01272 |                             | <i>bla</i> <sub>OXA-66</sub> (OXA-51 family), <i>bla</i> <sub>OXA-23</sub> | <i>bla</i> <sub>ADC-73</sub> |                             | 2   | IMP       |
| C01298 |                             | <i>bla</i> <sub>OXA-66</sub> (OXA-51 family), <i>bla</i> <sub>OXA-23</sub> | <i>bla</i> <sub>ADC-73</sub> | <i>bla</i> <sub>TEM-1</sub> | 2   | IMP       |
| C01301 |                             | <i>bla</i> <sub>OXA-66</sub> (OXA-51 family), <i>bla</i> <sub>OXA-23</sub> | <i>bla</i> <sub>ADC-73</sub> | <i>bla</i> <sub>TEM-1</sub> | 2   | IMP       |



|          |                             |                                                                                                                                       |                               |                               |     |     |
|----------|-----------------------------|---------------------------------------------------------------------------------------------------------------------------------------|-------------------------------|-------------------------------|-----|-----|
| C01319   |                             | <i>bla</i> <sub>OXA-66</sub> (OXA-51 family), <i>bla</i> <sub>OXA-23</sub>                                                            | <i>bla</i> <sub>ADC-73</sub>  | <i>bla</i> <sub>TEM-1</sub>   | 2   | IMP |
| C01323   |                             | <i>bla</i> <sub>OXA-66</sub> (OXA-51 family), <i>bla</i> <sub>OXA-23</sub>                                                            | <i>bla</i> <sub>ADC-73</sub>  | <i>bla</i> <sub>TEM-1</sub>   | 2   | IMP |
| C01339   |                             | <i>bla</i> <sub>OXA-66</sub> (OXA-51 family), <i>bla</i> <sub>OXA-23</sub>                                                            | <i>bla</i> <sub>ADC-73</sub>  | <i>bla</i> <sub>TEM-1</sub>   | 2   | IMP |
| C01344   |                             | <i>bla</i> <sub>OXA-66</sub> (OXA-51 family), <i>bla</i> <sub>OXA-23</sub>                                                            | <i>bla</i> <sub>ADC</sub>     |                               | 2   | IMP |
| C01348   |                             | <i>bla</i> <sub>OXA-66</sub> (OXA-51 family), <i>bla</i> <sub>OXA-23</sub>                                                            | <i>bla</i> <sub>ADC</sub>     |                               | 2   | IMP |
| S00037   | <i>bla</i> <sub>NDM-1</sub> | <i>bla</i> <sub>OXA-121</sub> (OXA-51 family)                                                                                         | <i>bla</i> <sub>ADC-163</sub> |                               | 150 | NDM |
| S00068   |                             | <i>bla</i> <sub>OXA</sub> (OXA-51 family), <i>bla</i> <sub>OXA-23</sub>                                                               | <i>bla</i> <sub>ADC-73</sub>  |                               | 2   | IMP |
| S00100   |                             | <i>bla</i> <sub>OXA-66</sub> (OXA-51 family), <i>bla</i> <sub>OXA-23</sub>                                                            | <i>bla</i> <sub>ADC-73</sub>  | <i>bla</i> <sub>TEM-1</sub>   | 2   | IMP |
| S00151   |                             | <i>bla</i> <sub>OXA-91</sub> (OXA-51 family), <i>bla</i> <sub>OXA-23</sub>                                                            | <i>bla</i> <sub>ADC-52</sub>  | <i>bla</i> <sub>CARB-16</sub> | 164 | IMP |
| S00198-A |                             | <i>bla</i> <sub>OXA-66</sub> (OXA-51 family), <i>bla</i> <sub>OXA-72</sub> (OXA-24 family), <i>bla</i> <sub>OXA</sub> (OXA-23 family) | <i>bla</i> <sub>ADC-115</sub> |                               | 2   | IMP |
| S00199-B |                             | <i>bla</i> <sub>OXA-91</sub> (OXA-51 family), <i>bla</i> <sub>OXA-23</sub>                                                            | <i>bla</i> <sub>ADC-52</sub>  | <i>bla</i> <sub>CARB-16</sub> | 164 | IMP |
| S00330   |                             | <i>bla</i> <sub>OXA-91</sub> (OXA-51 family), <i>bla</i> <sub>OXA-23</sub>                                                            | <i>bla</i> <sub>ADC-52</sub>  | <i>bla</i> <sub>CARB-16</sub> | 164 | IMP |
| S00386-B |                             | <i>bla</i> <sub>OXA-91</sub> (OXA-51 family), <i>bla</i> <sub>OXA-23</sub>                                                            | <i>bla</i> <sub>ADC-52</sub>  | <i>bla</i> <sub>CARB-16</sub> | 164 | IMP |
| S00404-B |                             | <i>bla</i> <sub>OXA-69</sub> (OXA-51 family), <i>bla</i> <sub>OXA-23</sub>                                                            | <i>bla</i> <sub>ADC-11</sub>  |                               | 1   | IMP |
| S00473   |                             | <i>bla</i> <sub>OXA-51</sub> , <i>bla</i> <sub>OXA-23</sub>                                                                           | <i>bla</i> <sub>ADC-165</sub> |                               | 218 | IMP |
| S00939   |                             | <i>bla</i> <sub>OXA-66</sub> (OXA-51 family), <i>bla</i> <sub>OXA-23</sub>                                                            | <i>bla</i> <sub>ADC-73</sub>  |                               | 2   | IMP |

|          |  |                                                                                         |                              |                               |     |     |
|----------|--|-----------------------------------------------------------------------------------------|------------------------------|-------------------------------|-----|-----|
| S01246-B |  | <i>bla</i> <sub>OXA-69</sub> (OXA-51 family), <i>bla</i> <sub>OXA</sub> (OXA-23 family) | <i>bla</i> <sub>ADC-11</sub> |                               | 1   | IMP |
| S01256-A |  | <i>bla</i> <sub>OXA-66</sub> (OXA-51 family), <i>bla</i> <sub>OXA-23</sub>              | <i>bla</i> <sub>ADC-73</sub> |                               | 2   | IMP |
| S01272-B |  | <i>bla</i> <sub>OXA-69</sub> (OXA-51 family), <i>bla</i> <sub>OXA-23</sub>              | <i>bla</i> <sub>ADC-11</sub> |                               | 1   | IMP |
| S01368-C |  | <i>bla</i> <sub>OXA-66</sub> (OXA-51 family), <i>bla</i> <sub>OXA-23</sub>              | <i>bla</i> <sub>ADC-73</sub> | <i>bla</i> <sub>TEM-1</sub>   | 2   | IMP |
| S01384-B |  | <i>bla</i> <sub>OXA-66</sub> (OXA-51 family), <i>bla</i> <sub>OXA-23</sub>              | <i>bla</i> <sub>ADC-73</sub> |                               | 2   | IMP |
| S01403-A |  | <i>bla</i> <sub>OXA-69</sub> (OXA-51 family), <i>bla</i> <sub>OXA-23</sub>              | <i>bla</i> <sub>ADC-11</sub> |                               | 1   | IMP |
| S01427   |  | <i>bla</i> <sub>OXA-66</sub> (OXA-51 family), <i>bla</i> <sub>OXA-23</sub>              | <i>bla</i> <sub>ADC-73</sub> | <i>bla</i> <sub>TEM-1</sub>   | 2   | IMP |
| S01478-A |  | <i>bla</i> <sub>OXA-66</sub> (OXA-51 family), <i>bla</i> <sub>OXA-23</sub>              | <i>bla</i> <sub>ADC-73</sub> |                               | 2   | IMP |
| S01522   |  | <i>bla</i> <sub>OXA-66</sub> (OXA-51 family), <i>bla</i> <sub>OXA-23</sub>              | <i>bla</i> <sub>ADC-73</sub> |                               | 2   | IMP |
| S01539   |  | <i>bla</i> <sub>OXA-66</sub> (OXA-51 family), <i>bla</i> <sub>OXA-23</sub>              | <i>bla</i> <sub>ADC-73</sub> | <i>bla</i> <sub>TEM-1</sub>   | 2   | IMP |
| S01545-A |  | <i>bla</i> <sub>OXA-66</sub> (OXA-51 family), <i>bla</i> <sub>OXA-23</sub>              | <i>bla</i> <sub>ADC-73</sub> | <i>bla</i> <sub>TEM-1</sub>   | 2   | IMP |
| S01560-A |  | <i>bla</i> <sub>OXA-69</sub> (OXA-51 family), <i>bla</i> <sub>OXA-23</sub>              | <i>bla</i> <sub>ADC-11</sub> |                               | 1   | IMP |
| S01573-A |  | <i>bla</i> <sub>OXA</sub> (OXA-51 family), <i>bla</i> <sub>OXA-23</sub>                 | <i>bla</i> <sub>ADC-73</sub> | <i>bla</i> <sub>TEM-1</sub>   | 2   | IMP |
| S01573-B |  | <i>bla</i> <sub>OXA</sub> (OXA-51 family), <i>bla</i> <sub>OXA-23</sub>                 | <i>bla</i> <sub>ADC-73</sub> | <i>bla</i> <sub>TEM-1</sub>   | 2   | IMP |
| S01582-B |  | <i>bla</i> <sub>OXA-66</sub> (OXA-51 family), <i>bla</i> <sub>OXA-23</sub>              | <i>bla</i> <sub>ADC-73</sub> | <i>bla</i> <sub>TEM-1</sub>   | 2   | IMP |
| S01588-A |  | <i>bla</i> <sub>OXA-69</sub> (OXA-51 family), <i>bla</i> <sub>OXA</sub> (OXA-23 family) | <i>bla</i> <sub>ADC-11</sub> |                               | 1   | IMP |
| S01659   |  | <i>bla</i> <sub>OXA-91</sub> (OXA-51 family), <i>bla</i> <sub>OXA-23</sub>              | <i>bla</i> <sub>ADC-52</sub> | <i>bla</i> <sub>CARB-16</sub> | 164 | IMP |

|          |  |                                                                                         |                               |                               |     |     |
|----------|--|-----------------------------------------------------------------------------------------|-------------------------------|-------------------------------|-----|-----|
| S01668-B |  | <i>bla</i> <sub>OXA-66</sub> (OXA-51 family), <i>bla</i> <sub>OXA-23</sub>              | <i>bla</i> <sub>ADC-73</sub>  | <i>bla</i> <sub>TEM-1</sub>   | 2   | IMP |
| S01835-A |  | <i>bla</i> <sub>OXA</sub> (OXA-51 family)                                               | <i>bla</i> <sub>ADC</sub>     |                               | 2   | IMP |
| S01856   |  | <i>bla</i> <sub>OXA-66</sub> (OXA-51 family), <i>bla</i> <sub>OXA-23</sub>              | <i>bla</i> <sub>ADC-73</sub>  |                               | 164 | IMP |
| S01862-A |  | <i>bla</i> <sub>OXA-91</sub> (OXA-51 family), <i>bla</i> <sub>OXA-23</sub>              | <i>bla</i> <sub>ADC-52</sub>  | <i>bla</i> <sub>CARB-16</sub> | 1   | IMP |
| S01989-A |  | <i>bla</i> <sub>OXA-69</sub> (OXA-51 family), <i>bla</i> <sub>OXA-23</sub>              | <i>bla</i> <sub>ADC-11</sub>  |                               | 2   | IMP |
| S02043-B |  | <i>bla</i> <sub>OXA-66</sub> (OXA-51 family), <i>bla</i> <sub>OXA-23</sub>              | <i>bla</i> <sub>ADC-73</sub>  | <i>bla</i> <sub>TEM-1</sub>   | 1   | IMP |
| S02060-A |  | <i>bla</i> <sub>OXA-69</sub> (OXA-51 family), <i>bla</i> <sub>OXA</sub> (OXA-23 family) | <i>bla</i> <sub>ADC-11</sub>  |                               | 103 | IMP |
| S02111-A |  | <i>bla</i> <sub>OXA-70</sub> (OXA-51 family), <i>bla</i> <sub>OXA-23</sub>              | <i>bla</i> <sub>ADC-203</sub> | <i>bla</i> <sub>CARB-49</sub> | 1   | IMP |
| S02114-B |  | <i>bla</i> <sub>OXA-69</sub> (OXA-51 family), <i>bla</i> <sub>OXA-23</sub>              | <i>bla</i> <sub>ADC-11</sub>  |                               | 1   | IMP |
| S02132   |  | <i>bla</i> <sub>OXA-69</sub> (OXA-51 family), <i>bla</i> <sub>OXA-23</sub>              | <i>bla</i> <sub>ADC-11</sub>  |                               | 2   | IMP |
| S02150-B |  | <i>bla</i> <sub>OXA-66</sub> (OXA-51 family), <i>bla</i> <sub>OXA-23</sub>              | <i>bla</i> <sub>ADC</sub>     |                               | 164 | IMP |
| S02201   |  | <i>bla</i> <sub>OXA-91</sub> (OXA-51 family), <i>bla</i> <sub>OXA-23</sub>              | <i>bla</i> <sub>ADC-52</sub>  | <i>bla</i> <sub>CARB-16</sub> | 1   | IMP |
| S02231-A |  | <i>bla</i> <sub>OXA-69</sub> (OXA-51 family), <i>bla</i> <sub>OXA-23</sub>              | <i>bla</i> <sub>ADC-11</sub>  |                               | 2   | IMP |
| S02244   |  | <i>bla</i> <sub>OXA-66</sub> (OXA-51 family), <i>bla</i> <sub>OXA-23</sub>              | <i>bla</i> <sub>ADC-73</sub>  |                               | 2   | IMP |
| S02278-A |  | <i>bla</i> <sub>OXA-66</sub> (OXA-51 family), <i>bla</i> <sub>OXA-23</sub>              | <i>bla</i> <sub>ADC-73</sub>  |                               | 1   | IMP |
| S02358   |  | <i>bla</i> <sub>OXA-69</sub> (OXA-51 family), <i>bla</i> <sub>OXA-23</sub>              | <i>bla</i> <sub>ADC</sub>     |                               | NA  | IMP |

## **Detection and Analysis of IS*AbaI* Insertion Sequences in CRAB.**

### Methods

Detection of IS*AbaI* in the isolates that carry an OXA-51 or OXA-51-like gene was performed using two methods. Firstly, SRST2 was used with default parameters to map unassembled reads against the IS*AbaI* sequence obtained from the ISFinder database (accession number AY758396) [1-2]. Secondly, a BLASTN search of the IS*AbaI* sequence was performed against the assembled contigs [3].

### Results

Of the 97 CRAB isolates, 96 carried an OXA-51 family variant. Based on mapping of the unassembled reads, IS*AbaI* was detected in 95 isolates (99%) with 100% coverage and less than 1% nucleotide divergence. Subsequently, using a BLASTN search of the IS*AbaI* sequence against the assembled contigs, IS*AbaI* was detected with at least 99.5% identity and 95% coverage in 62 isolates (65%). The lack of IS*AbaI* detection in the contigs of the remaining isolates in which IS*AbaI* was detected in the unassembled reads was likely due to assembly fragmentation at the IS*AbaI* region, as assemblies were based on short-read sequencing data alone and complete genomes were not available. Of note, in all 62 isolates, the IS*AbaI* sequence was detected on a contig of length approximately 1.1kb that was different from the contig harbouring the OXA-51 family variant. Hence, the location of the IS*AbaI* sequence relative to the OXA-51 family variant could not be determined. Nevertheless, with 94 of the 96 OXA-51-variant-harboring isolates also producing either NDM-1 or OXA-23, it would be difficult to draw any conclusions on the direct contribution of OXA-51-family genes to carbapenem resistance in this cohort. For the two remaining CRAB isolates where an OXA-51-like gene was the only carbapenemase detected by WGS, IS*AbaI* was detected in one isolate; this isolate was also positive on CIMTris. The second isolate (in which IS*AbaI* was not detected by WGS) was CIMTris negative. This is consistent with existing observations that the presence of an IS*AbaI* sequence is required for constitutive expression of OXA-51 in *A. baumannii* [4].

## Supplementary References

1. Inouye M, Dashnow H, Raven LA, et al. SRST2: Rapid genomic surveillance for public health and hospital microbiology labs. 2014. *Genome Med.* 6(11):90.
2. Siguier P, Perochon J, Lestrade L, Mahillon J, Chandler M. ISfinder: the reference centre for bacterial insertion sequences. 2006. *Nucleic Acids Res.* 34(Database issue):D32-D36.
3. Camacho C, Coulouris G, Avagyan V, et al. BLAST+: architecture and applications. 2009. *BMC Bioinformatics.* 10:421.
4. Turton JF, Ward ME, Woodford N, et al. The role of ISAbal in expression of OXA carbapenemase genes in *Acinetobacter baumannii*. 2006. *FEMS Microbiol Lett.* 258(1):72-77.
